# Supplementary material for: Graphitized porous carbon prepared from pyrolysis of Sterculia scaphigera and its application in lithium ion batteries
Source: Royal Society of Chemistry journal article supplement (doi:10.1039/c5ra06215b), 2015-01-01
Supplement: c5ra06215b1.pdf [file c5ra06215b1.pdf]

Electronic Supplementary Information:

## Graphitized porous carbon prepared from pyrolysis of sterculia scaphigera and its application in lithium ion batteries

W. X. Wang<sup>a</sup>, Y. Wan<sup>a</sup>, S. F. Wu<sup>a</sup>, M. C. Li<sup>a,b</sup>, L. J. Cao<sup>a</sup>, F. C. Lv<sup>a</sup>, M. Y. Yang<sup>a,b</sup>, Z. F. Sun<sup>a</sup>, R. Sun<sup>c</sup> and Z. G. Lu<sup>a\*</sup>

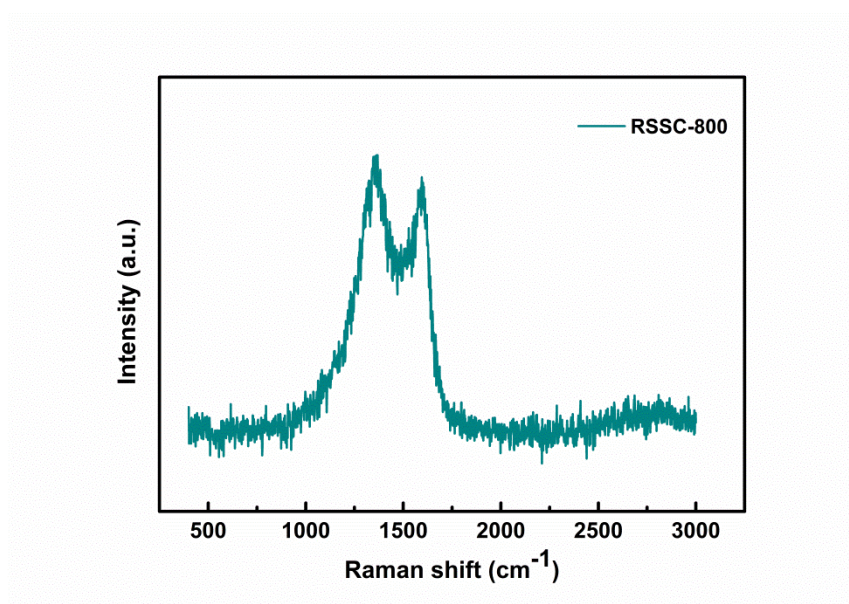

Figure S1 Raman spectrum of RSSC-800 carbon material.

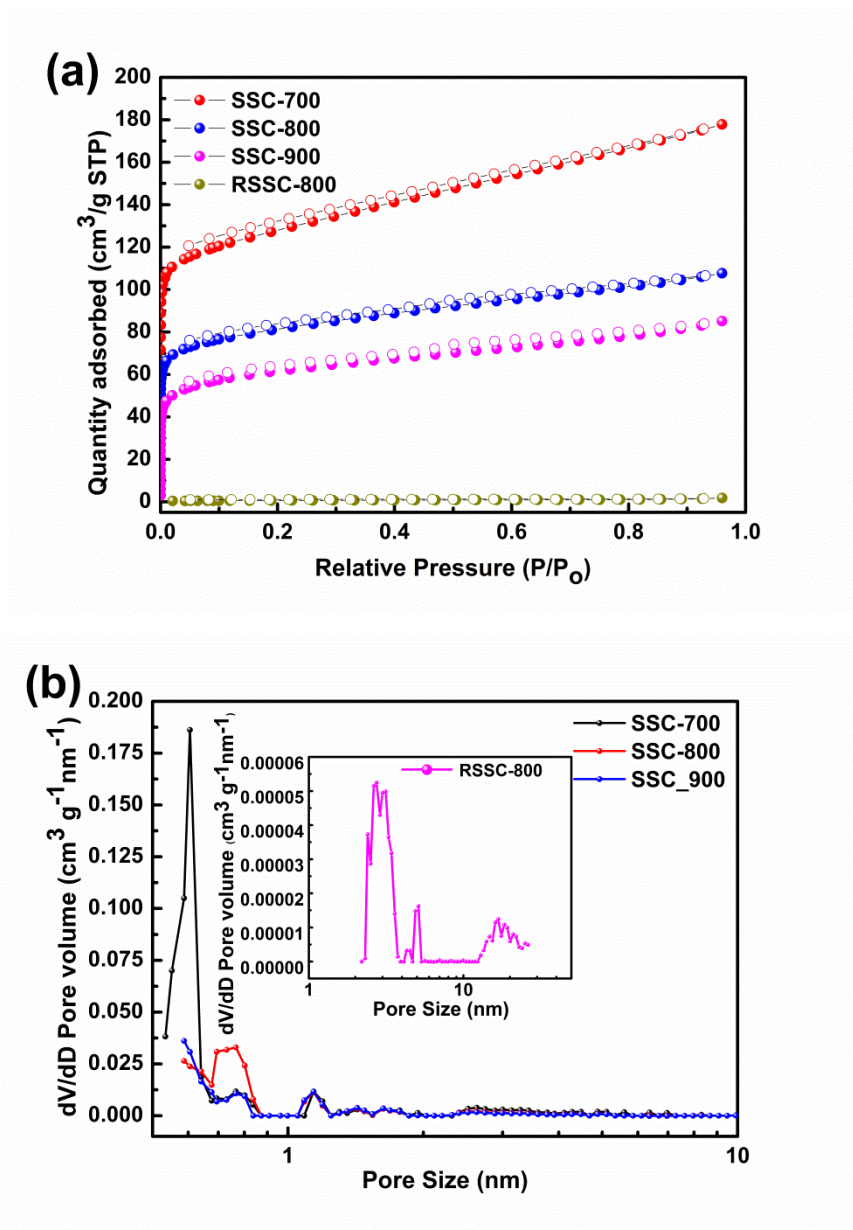

**Figure S2** (a) Nitrogen adsorption-desorption isotherms of RSSC-800 and SSC-X carbon material; (b) the corresponding pore size distribution (calculated from the adsorption isotherms using DFT method).

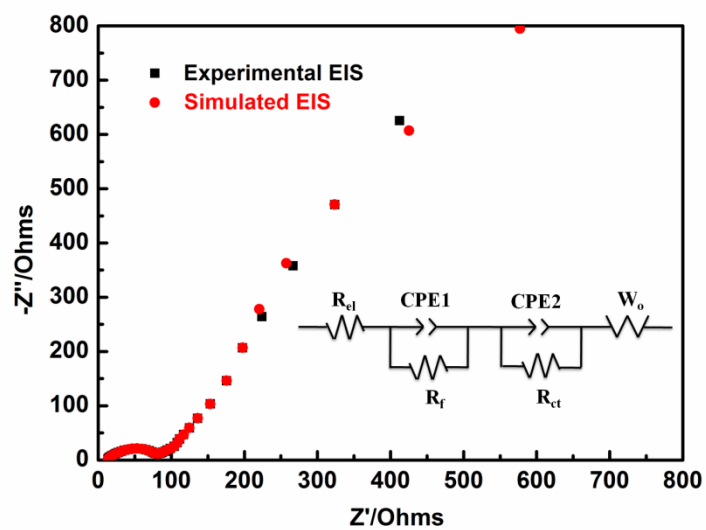

**Figure S3** Experimental and simulated EIS spectra with the equivalent circuit as an inset for sample SSC-800.

**Table S1** Textural properties of RSSC-800 and SSC-X specimens

| Sample   | $S_{\text{BET}}$<br>( $\text{m}^2 \text{g}^{-1}$ ) <sup>a</sup> | $V_{\text{t}}$<br>( $\text{cm}^3 \text{g}^{-1}$ ) <sup>b</sup> | Average pore size (nm) | $S_{\text{BET-Micro}}$ |
|----------|-----------------------------------------------------------------|----------------------------------------------------------------|------------------------|------------------------|
| RSSC-800 | 2.19                                                            | 0.002                                                          | 2.77                   | 2.02                   |
| SSC-700  | 481.74                                                          | 0.104                                                          | 1.96                   | 411.79                 |
| SSC-800  | 306.29                                                          | 0.055                                                          | 1.83                   | 260.71                 |
| SSC-900  | 228.86                                                          | 0.048                                                          | 2.04                   | 198.84                 |

<sup>a</sup> Specific surface area was calculated with Brunauer-Emmett-Teller method. <sup>b</sup> The total pore volume was determined at a relative pressure of 0.99
